# Supplementary material for: Simplified Footprint-Free Cas9/CRISPR Editing of Cardiac-Associated Genes in Human Pluripotent Stem Cells
Source: PubMed Central journal article supplement (PMC5882176; doi:10.1089/scd.2017.0268), 2018-03-15
Supplement: Supp_Table1.pdf [file Supp_Table1.pdf]

SUPPLEMENTARY TABLE S1. PRIMERS FOR VECTOR CONSTRUCTION AND GENOTYPING

| Target    | Accession  | Reagent               | Use        | Forward/<br>reverse | 5' → 3' sequence                                       | Product<br>size (bp)                                  | See Fig. |         |
|-----------|------------|-----------------------|------------|---------------------|--------------------------------------------------------|-------------------------------------------------------|----------|---------|
| ADRB2     | NM_000024  | LH primer             | VC         | F                   | GGTCGACGGTATCGATAAGCTTGATT<br>TCGGAGTACCCAGATGGAGAC    | 1084                                                  | Fig. 1A  |         |
|           |            |                       |            | R                   | ACGCAGACTATCTTTCTAGGGTTAA<br>AGACATGACGATGCCCATGC      |                                                       |          |         |
|           |            | RH primer             |            |                     | F                                                      | CAATATGATTATCTTTCTAGGGTTAA<br>TCGTCTGGCCATCGTGTGG     | 1083     |         |
|           |            |                       |            |                     | R                                                      | ATCCCCGGGCTGCAGGAATTCGATA<br>GTCTTCCGTGCTGGGAGGTC     |          |         |
|           |            | ADRB2puroΔtk          | CA         |                     | F                                                      | CATCGTCATGTCTTTAACCCCTAGAAA<br>GATAGTCTGCC            | 3267     |         |
|           |            |                       |            |                     | R                                                      | ACACGATGGCCAGGACGATTAACCCT<br>AGAAAGATAATCATATTGTGACG |          |         |
|           |            | puroΔtkADRB2          |            |                     | F                                                      | GCTCGGGTGAGGCAAGTTCGG                                 | 1331     |         |
|           |            |                       |            |                     | R                                                      | ATGGCAAAGTAGCGATCCAC                                  |          |         |
|           |            | Primer b1             | Genotyping |                     | F                                                      | GCTGAGTGTGCAGGACGAGT                                  | 555      | Fig. 5  |
|           |            |                       |            |                     | R                                                      | ATGGCAAAGTAGCGATCCAC                                  |          |         |
|           |            | Primer b2             | Expression |                     | F                                                      | GCTGAGTGTGCAGGACGAGT                                  | 555      | Fig. 5  |
|           |            |                       |            |                     | R                                                      | ATGGCAAAGTAGCGATCCAC                                  |          |         |
|           |            | Primer b3             | Expression |                     | F                                                      | GCTGAGTGTGCAGGACGAGT                                  | 555      | Fig. 5  |
|           |            |                       |            |                     | R                                                      | ATGGCAAAGTAGCGATCCAC                                  |          |         |
|           |            | Primer b4             | Expression |                     | F                                                      | GCTGAGTGTGCAGGACGAGT                                  | 555      | Fig. 5  |
|           |            |                       |            |                     | R                                                      | ATGGCAAAGTAGCGATCCAC                                  |          |         |
|           |            | gRNA                  | Targeting  | + Strand            | F                                                      | GCCGGACCACGACGTCACGC                                  | n.a.     | Fig. 2  |
|           |            |                       |            |                     | R                                                      | CCTGAGCTGCTCCTTTCC                                    |          |         |
|           | NM_198179  | Primer OT1            | OT1        |                     | F                                                      | CCAGAGCATTGCCAAAGAGC                                  | 378      | Fig. 3C |
| R         |            |                       |            |                     | CAGCATGGAGAAGAGGAGCC                                   |                                                       |          |         |
| NM_002570 | Primer OT2 | OT2                   |            | F                   | ACTGTCACCCTTGTCCCAGA                                   | 387                                                   |          |         |
|           |            |                       |            | R                   | GATGCCATCATGGAGCCTCT                                   |                                                       |          |         |
| NM_138384 | Primer OT3 | OT3                   |            | F                   | ACCCTAGTGACCAGCATGGA                                   | 357                                                   |          |         |
|           |            |                       |            | R                   | TGCACTCAATGAGCAAGGCT                                   |                                                       |          |         |
| NM_014668 | Primer OT4 | OT4                   |            | F                   | CCCAGCTGGACCAGGTAGTA                                   | 344                                                   |          |         |
|           |            |                       |            | R                   | GAGGAGGTGATCAGGCAGC                                    |                                                       |          |         |
| NM_033405 | Primer OT5 | OT5                   |            | F                   | TCCCATGCTTCTCACACAG                                    | 332                                                   |          |         |
|           |            |                       |            | R                   | GCTGAGTGTGCAGGACGAGT                                   |                                                       |          |         |
| NM_000024 | ADRB2      | Random<br>integration |            | F                   | ATGGCAAAGTAGCGATCCAC                                   | 554                                                   | Fig. 3D  |         |
|           |            |                       |            | R                   | GCTGAGTGTGCAGGACGAGT                                   |                                                       |          |         |
| n/a       | ADRB2-PT   |                       |            | F                   | CTAAATGCACAGCGACGGATTCGCGC                             | 371                                                   |          |         |
|           |            |                       |            | R                   | ATAGACGGTCTCACGGGAT                                    |                                                       |          |         |
|           | TK         |                       |            | F                   | ATATGAGGAGCCAGAACGGC                                   | 269                                                   |          |         |
|           |            |                       |            | R                   | CTGCAATGATACCGCGAGAC                                   |                                                       |          |         |
|           | AMP        |                       |            | F                   | TCCCTTGAGAGTTTCGCCCC                                   | 576                                                   |          |         |
|           |            |                       |            | R                   | GGTCGACGGTATCGATAAGCTTGATT                             |                                                       |          |         |
| GRK5      | NM_005308  | LH primer             | VC         | F                   | AAGCGCCACTGTAAGGGTGGAGAG<br>ACGCAGACTATCTTTCTAGGGTTAAT | 1156                                                  | Fig. 5   |         |
|           |            |                       |            | R                   | GCACAAACGGCTTGGCGGATCACC<br>CAATATGATTATCTTTCTAGGGTTAA |                                                       |          |         |
|           |            | RH primer             |            |                     | F                                                      | GGCAAATGGGTGAGCCGCAAGCTG<br>AGTGGATCCCCGGGCTGCAGGAATT | 1146     |         |
|           |            |                       |            |                     | R                                                      | CGATGGCACAGATGGCCTCCTATC<br>CAGAGCAAGGTGGAGGACAG      |          |         |
|           |            | Primer g1             | Genotyping |                     | F                                                      | GATAGGAGGCCATCTGTGCC                                  | 1446     |         |
|           |            |                       |            |                     | R                                                      | TCCGAAGGACCATAGACAGAGA                                |          |         |
|           |            | Primer g2             | Expression |                     | F                                                      | TCCGAAGGACCATAGACAGAGA                                | 403      |         |
|           |            |                       |            |                     | R                                                      | TGCCTTTCCAACCACTTCCA                                  |          |         |
|           |            | Primer g3             | Expression |                     | F                                                      | TGCCTTTCCAACCACTTCCA                                  | 403      |         |
|           |            |                       |            |                     | R                                                      | TTTGTGCATTAAGGCAAATG                                  |          |         |
|           |            | Primer g4             | Expression |                     | F                                                      | TTTGTGCATTAAGGCAAATG                                  | n.a.     | Fig. 4  |
| R         |            |                       |            |                     | TTTGTGCATTAAGGCAAATG                                   |                                                       |          |         |
|           | gRNA 2a    | Targeting             | - Strand   | F                   | TTTGTGCATTAAGGCAAATG                                   | n.a.                                                  | Fig. 4   |         |
|           |            |                       |            | R                   | TTTGTGCATTAAGGCAAATG                                   |                                                       |          |         |
|           | gRNA 2b    | Targeting             | + Strand   | F                   | GTGAGGCAAATGCCAATCAG                                   | n.a.                                                  | Fig. 4   |         |
|           |            |                       |            | R                   | GTGAGGCAAATGCCAATCAG                                   |                                                       |          |         |
| ACTC1     | NM_005159  | LH primer             | VC         | F                   | GGTCGACGGTATCGATAAGCTTGAT<br>GCCAGACAGGCTGCCAAGCAGG    | 1050                                                  | Fig. 5   |         |
|           |            |                       |            | R                   | ACGCAGACTATCTTTCTAGGGTTAAC<br>TCTTTCTTTAGCACAGAC       |                                                       |          |         |
|           |            | RH primer             |            |                     | F                                                      | CAATATGATTATCTTTCTAGGGTTAAC<br>AGTAGTGCCCTGAGGTTAGTTT | 1051     |         |
|           |            |                       |            |                     | R                                                      | ATCCCCGGGCTGCAGGAATTCGATG<br>CTGGAAGAGTGTCTCAGGACAG   |          |         |
|           |            | Primer a1             | Genotyping |                     | F                                                      | CACCTGACCCCTTGTTCGA                                   | 2267     |         |
|           |            |                       |            |                     | R                                                      | GCGGATTCAGTGAGAGAGGA                                  |          |         |
|           |            | Primer a2             | Genotyping |                     | F                                                      | GCGGATTCAGTGAGAGAGGA                                  | 2267     |         |
|           |            |                       |            |                     | R                                                      | GCGGATTCAGTGAGAGAGGA                                  |          |         |
|           |            | Primer a3             | Expression |                     | F                                                      | GGTGATGAAGCCCAGAGCAA                                  | 461      |         |
|           |            |                       |            |                     | R                                                      | GGTGATGAAGCCCAGAGCAA                                  |          |         |
|           | Primer a4  | Expression            |            | F                   | GGTGATGAAGCCCAGAGCAA                                   | 461                                                   |          |         |
|           |            |                       |            | R                   | GGTGATGAAGCCCAGAGCAA                                   |                                                       |          |         |
|           | gRNA       | Targeting             | + Strand   | F                   | GAGTTAACAGTAGTGCCCTG                                   | n.a.                                                  | Fig. 4   |         |
|           |            |                       |            | R                   | GAGTTAACAGTAGTGCCCTG                                   |                                                       |          |         |

(continued)

SUPPLEMENTARY TABLE S1. (CONTINUED)

| <i>Target</i> | <i>Accession</i>      | <i>Reagent</i> | <i>Use</i>  | <i>Forward/<br/>reverse</i>        | <i>5' → 3' sequence</i>                       | <i>Product<br/>size (bp)</i> | <i>See Fig.</i>      |      |        |
|---------------|-----------------------|----------------|-------------|------------------------------------|-----------------------------------------------|------------------------------|----------------------|------|--------|
| <i>RYR2</i>   | NG_008799.2           | LH primer      | VC          | F                                  | ACGGTATCGATAAGCTTGATTACGT<br>AAAATTTAAACTTTAA | 360                          | Fig. 5               |      |        |
|               |                       |                |             | R                                  | GACTATCTTTCTAGGGTTAAAATATT<br>GAGAAAACCGTGAA  |                              |                      |      |        |
|               |                       | RH primer      |             | F                                  | TGATTATCTTTCTAGGGTTAATATAA<br>GTAAGGTTGGTGCA  | 1041                         |                      |      |        |
|               |                       |                |             | R                                  | CCGGGCTGCAGGAATTCGAT<br>CAGTAAAGGAAACAGGAAGA  |                              |                      |      |        |
|               |                       | Primer r1      | Genotyping  | F                                  | CCCCAGCTATGAGAGGTTCA                          | 445                          |                      |      |        |
|               |                       |                |             | R                                  | GAACGTTGGTTCTCCTTCCA                          |                              |                      |      |        |
|               |                       | Primer r2      | Expression  | F                                  | TGCATGAAAGCATCAAACGCA                         | 560                          |                      |      |        |
|               |                       |                |             | R                                  | TGAGTAGAGCCGGAGAGTGT                          |                              |                      |      |        |
|               |                       | <i>ACTB</i>    | NM_001101.3 | gRNA<br>Primer GAP1<br>Primer GAP2 | Targeting<br>Expression                       | + Strand                     | ATTTTAAATATAAGTAAGGT | n.a. | Fig. 4 |
|               |                       |                |             |                                    |                                               | F                            | CAAGAGATGGCCACGGCT   | 312  | Fig. 5 |
| R             | CTTGATCTTCATTGTGCTGGG |                |             |                                    |                                               |                              |                      |      |        |
|               |                       |                |             |                                    |                                               |                              |                      |      |        |

CA, cassette amplification; LH, left homology; RH, right homology; VC, vector construction.
